# Supplementary material for: Ultrasound- and Molecular Sieves-Assisted Synthesis, Molecular Docking and Antifungal Evaluation of 5-(4-(Benzyloxy)-substituted phenyl)-3-((phenylamino)methyl)-1,3,4-oxadiazole-2(3H)-thiones
Source: PubMed Central journal article supplement (PMC6273549; doi:10.3390/molecules21050484), 2016-05-10
Supplement: molecules-21-00484-s001.pdf [file molecules-21-00484-s001.pdf]

# Supplementary Materials: Ultrasound- and Molecular Sieves-Assisted Synthesis, Molecular Docking and Antifungal Evaluation of 5-(4-(Benzyloxy)-substituted phenyl)-3-((phenylamino)methyl)-1,3,4-oxadiazole-2(3H)-thiones

Urja D. Nimbalkar, Santosh G. Tupe, Julio A. Seijas Vazquez, Firoz A. Kalam Khan, Jaiprakash N. Sangshetti and Anna Pratima G. Nikalje

Table S1. Characterization data of Mannich bases (6a–o).

| Derivatives | R/Ar                                                                                | (Mol. Wt) | Yield (%) | m.p. (°C) | R <sub>f</sub> |
|-------------|-------------------------------------------------------------------------------------|-----------|-----------|-----------|----------------|
| a           | 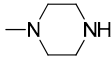   | 382.48    | 80        | 205       | 0.4            |
| b           |    | 423.92    | 81        | 180       | 0.7            |
| c           |    | 365.41    | 78        | 235       | 0.5            |
| d           |    | 364.42    | 79        | 240       | 0.4            |
| e           |   | 468.91    | 81        | 218       | 0.6            |
| f           |  | 417.52    | 79        | 230       | 0.4            |
| g           |  | 468.37    | 81        | 228       | 0.6            |
| h           |  | 434.47    | 90        | 220       | 0.3            |
| i           |  | 479.47    | 82        | 145       | 0.5            |
| j           |  | 383.46    | 85        | 200       | 0.4            |
| k           |  | 389.47    | 80        | 80        | 0.3            |
| l           |  | 419.13    | 81        | 100       | 0.5            |
| m           |  | 433.48    | 79        | 140       | 0.5            |
| n           |  | 327.40    | 78        | 110       | 0.2            |
| o           |  | 465.57    | 79        | 115       | 0.4            |
